# Supplementary material for: Genome-wide identification, phylogenetic analysis, expression profiling, and protein–protein interaction properties of TOPLESS gene family members in tomato
Source: PubMed Central journal article supplement (PMC3935560; doi:10.1093/jxb/ert440), 2014-01-07
Supplement: supp_ert440_jexbot110148_file001.pdf [file supp_ert440_jexbot110148_file001.pdf]

# WD40-repeat 2

At-tp1 TEVSEPSQCRSLRLPEN-LRVAKISRLIFITNSGNAILALASNAIHLWKWRNERNATGKATASLPPQWOPASGILMTNDVAE-TNPEEAVPCFALSKNDSYVMSASGGKISLFNMMTFKTMATFMPPPPAATFLAFHPQDNIIAIGM 913  
At-tp1 TEVSEPSQCRSLRLPEN-MRVTKISRLIFITNSGNAILALASNAIHLWKWRNERNATGKATASLPPQWOPASGILMTNDVAE-TNPEEAVPCFALSKNDSYVMSASGGKISLFNMMTFKTMATFMPPPPAATFLAFHPQDNIIAIGM 901  
Sl-tp11 TEISESSQCRSLKLPEN-LRVTKISRLIYITNSGNVAVLALASNAIHLWKWRNERNTSGKATASVSPQLWOPSSGILMTNDVHE-PNHEEAVSCFALSKNDSYVMSASGGKISLFNMMTFKTMATFMPPPPAATFLAFHPQDNIIAIGM 914  
At-tp4 TEISERSQRLRLRLPDT-LLPARVVKLIYITNSGGAILALAEAAHKLWKWRKSERNLLGKANVNPVQLWOPSSGILMTNDTRE-GNKEDVVPFCFALSKNDSYVMSASGGKISLFNMMTFKTMATFMPPPPAATFLAFHPQDNIIAIGM 923  
Sl-tp14 TEISEFAQVRSRRLPDN-QLSVRIIRLMIYITNSGGAILALAYNAVHKLWKWRNERNVTGKASTAVPPQLWOPSSGILMTNDISD-TNPEEAVPCFALSKNDSYVMSASGGKISLFNMMTFKTMATFMPPPPAATFLAFHPQDNIIAIGM 921  
Sl-tp15 TEINEPSQCRFLKLPDS-ATTFRVTRLIYITNSGYAILALAAAVHKLWKWRNDRHPTGKANASIVPQLWOPASGILMTNDIND-TNPEEVPCFALSKNDSYVMSASGGKISLFNMMTFKTMATFMPPPPAATFLAFHPQDNIIAIGM 922  
At-tp3 AEILDPSQCFQATLPDTAGSSTKVVLITNSGAGILALGSGNGIQLRWKWPNEONPSGKATATVVPQWOPNSGILLMTNDVSG-VNLENAAPCFALSKNDSYVMSAAGGKVSLEFNMMTFKVMATFMPPPPAATFLAFHPQDNIIAIGM 898  
Sl-tp13 TEILDQAQCRRLVITMPESSDSNNKVARLLYITNSGVGILALGSGNGTQKLWKWRNEONPSGKATANVVPQWOPNSGILLMTNDIVG-INLEEAVPCFALSKNDSYVMSAAGGKVSLEFNMMTFKVMATFMPPPPAATFLAFHPQDNIIAIGM 912  
At-tp2 TEIVDPTQCRQVITMPESSDSVSKVARLLYITNSGVGVLALGSGNGVQLRWKWRNEONPTGKATASVTPQWOPNSGILLMTNDVDP--ENPEGSVPCFALSKNDSYVMSACGGKVSLEFNMMTFKVMATFMPPPPAATFLAFHPQDNIIAIGM 909  
Sl-tp12 SDIADSSQLKRLKLPDF-LSASKVLRLLYITNSGLSVLALSSNAIHLWKWRNERNPSGSSAAVVPQWOPNSGILLMTNDVDP--ENPEGSVPCFALSKNDSYVMSAAGGKVSLEFNMMTFKVMATFMPPPPAATFLAFHPQDNIIAIGM 916  
Sl-tp16 SKVVQISRCQSLRLPSE-VKTKNVCRLAYAQAGNILVALVTGGIHLWKWSESDSNTLQGTTPKCPQLWOPSSGVVPENSLLS-SDAGAVSPCFALTNNGFVALSAGGAVSIFNINLYKIMKSIITPPKPAATCIACHPTNNVIAVGM 1017  
.....910.....920.....930.....940.....950.....960.....970.....980.....990.....1000.....1010.....1020.....1030.....1040.....1050

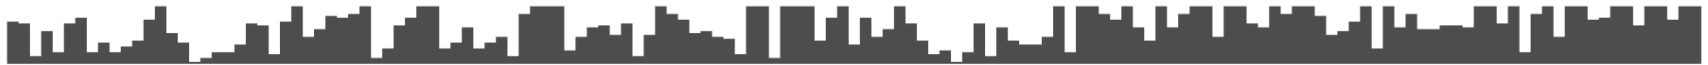

At-tp1 DDSTIQIYNVRVDEVSKLKGHSKRITGLAFSNVLNVLVSSGADAQLCVWNTDGWKQRKSKVLPLPQGRNSAPSDTRVQFHODQAHFLVVHETQLAIYETTKLECKMKQWAVRE-SLAPIIHAIFSCDSQLVYASFMDATVCFVSSANLR 1062  
At-tp1 DDSTIQIYNVRVDEVSKLKGHSKRITGLAFSNVLNVLVSSGADAQLCVWNTDGWKQRKSKVLQIPQGRSTSLSDTRVQFHODQAHFLVVHETQLAIYETTKLECKMKQWAVRE-SAAPIIHAIFSCDSQLIYTSFMDATICVFFSANLR 1050  
Sl-tp11 DDSTIQIYNVRVDEVSKLKGHSKRITGLAFSHVLNVLVSSGADSLCVWSDGWKQRARILQLP-GRSTSQ-SDTRVQFHODQTHFLAVHQAQIAIFETTKLECKMKQWAVRE-SAAPISHAIFSCDSQLIYASFMDATVCFVTAGHLH 1061  
At-tp4 DDSSIQIYNVRVDEVSKLKGHSKRITGLAFSNVLNVLVSSGADSLCVWSDGWKQASKQIQIPSGHSPNLAHTRVQFHODQIHVLVVHETQLAIYEAAPKLECKMKQWAVRE-SEGSVIHAIFSCDSQLIYAFDDGVSIFIAAALK 1072  
Sl-tp14 EDSSIQIYNVRVDEVSKLKGHSKRITGLAFSNVLNVLVSSGADSLCVWSDGWKQASKQIQIPSGRAINLAHTRVQFHODQTHLLVVHETQLAIYEAASKLECKMKQWAVRE--PNFAVTDATYSCDSQLIYAFDDGVSIFIAAALK 1068  
Sl-tp15 DDSSIQIYNVRVDEVSKLKGHSKRITGLAFSNVLNVLVSSGADSLCVWSDTWKQTSKYLQIPAGRAAAPQADTRVQFHODQTHLLVVHETQLAIYEAAPKLECKMKQWAVRE-VTGPIIHAIFSCDSQLIYAFDDGVSIFIAAALK 1071  
At-tp3 EDSTIHIYNVRVDEVSKLKGHSKRITGLAFSTALNVLVSSGADAQLCVWSDTWKQTSKYLQIPAGRAAAPQADTRVQFHODQTHLLVVHETQLAIYEAAPKLECKMKQWAVRE-VTGPIIHAIFSCDSQLIYAFDDGVSIFIAAALK 1046  
Sl-tp13 EDSTIHIYNVRVDEVSKLKGHSKRITGLAFSTALNVLVSSGADAQLCVWSDTWKQTSKYLQIPAGRAAAPQADTRVQFHODQTHLLVVHETQLAIYEAAPKLECKMKQWAVRE-VTGPIIHAIFSCDSQLIYAFDDGVSIFIAAALK 1060  
At-tp2 EDSSIQIYNVRVDEVSKLKGHSKRITGLAFSTALNVLVSSGADAQLCVWSDTWKQTSKYLQIPAGRAAAPQADTRVQFHODQTHLLVVHETQLAIYEAAPKLECKMKQWAVRE-VTGPIIHAIFSCDSQLIYAFDDGVSIFIAAALK 1057  
Sl-tp12 EDSTIHIYNVRVDEVSKLKGHSKRITGLAFSTALNVLVSSGADAQLCVWSDTWKQTSKYLQIPAGRAAAPQADTRVQFHODQTHLLVVHETQLAIYEAAPKLECKMKQWAVRE-VTGPIIHAIFSCDSQLIYAFDDGVSIFIAAALK 1065  
Sl-tp16 DDLEIIVVSVTEELISRLNGHSKRITGLAFSNVLNVLVSSGADSLCVWSDTWKQTSKYLQIPAGRAAAPQADTRVQFHODQTHLLVVHETQLAIYEAAPKLECKMKQWAVRE-VTGPIIHAIFSCDSQLIYAFDDGVSIFIAAALK 1166  
.....1060.....1070.....1080.....1090.....1100.....1110.....1120.....1130.....1140.....1150.....1160.....1170.....1180.....1190.....1200

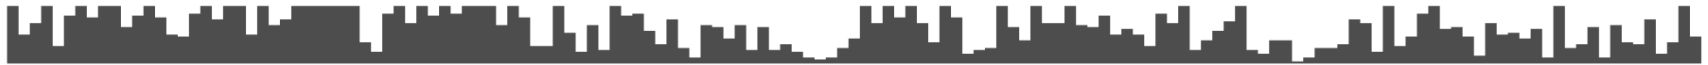

At-tp1 LRCRVNPSAYLPA--SLNSNVHPLVIAAHPQEPNMFVAVGLSDGGVHIFEPLESEKQWVAPPAEN---GSASGAPLAPSVGASASDQPOR 1148  
At-tp1 LRCRVNPSAYLPA--SLNSNVHPLVIAAHPQEPNMFVAVGLSDGGVHIFEPLESEKQWVAPPAEN---GSASAVTATPSVGASASDQPOR 1136  
Sl-tp11 MRCRIIPSAYLPS--SISNSNIHPVVVAAHPQDPNQFALGLSDGSHVHIFEPLESEKQWVAPPAEN---GSTNGMPTAPSIGASDQAPR 1147  
At-tp4 LKCRIGPNSYLP--NPS-SRVYYPATVAAHPSEPNQFVAVGLSDGGVHIFEPLESEKQWVAPPAEN---GAG---PVSSAP-GSDQQR 1152  
Sl-tp14 LRCRVNPAAYLPS--NPS-SRVYPLVAAHPSESNCQAVGLSDGGVHIFEPLESEKQWVAPPAEN---GVA---FGMSAATGLDQASR 1149  
Sl-tp15 WRCRINPISYLP--NPS-ARVHPLVIAAHPQDPNQFALGLSDGAVIVLEPLESEKQWVAPPAEN---GNG---PSTSGAA-NSDQPOR 1151  
At-tp3 LRCRISPSAYLPQ---GNQGLSPLVVAHPQDPNQFVAVGLSDGAVIVLEPLESEKQWVAPPAEN---AINSPSTISNQTPQOR 1125  
Sl-tp13 LRCRVNPSAYLPA--SLNSNVHPLVIAAHPQEPNMFVAVGLSDGGVHIFEPLESEKQWVAPPAEN---GMLNGRVASSSTANNHAADQOR 1149  
At-tp2 LRCRIAPSAVMPQTP--NSAIFPQVITAHPEPNQFVAVGLSDGGVHIFEPLESEKQWVAPPAEN---GMLNGRVASSSTANNHAADQOR 1148  
Sl-tp12 LRCRIAPSAVMPQTP--NSAIFPQVITAHPEPNQFVAVGLSDGGVHIFEPLESEKQWVAPPAEN---GAMPSPSSSALNSQSETPSR 1152  
Sl-tp16 PKVEIDPSTFLTS-DLSCSAHVFPVVVAAHPENPQLALGLSDGGVHIFEPLESEKQWVAPPAEN---LITNEQPI 1238  
.....1210.....1220.....1230.....1240.....1250.....1260.....1270.....1280.....1290..

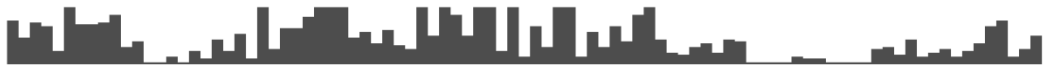

**Supplementary Table 1 : NLS prediction scores computed with cNLS Mapper (Kosugi et al, 2009)**

| SI-TPL         | Score    | Position | NLS sequence                     | Structure   |
|----------------|----------|----------|----------------------------------|-------------|
| <b>SI-TPL1</b> | 6        | 588      | RTYQGFRKRSLGVVQFDTTKNRFL         | Bipartite   |
| <b>SI-TPL2</b> | 5        | 304      | HLMKRM RAG                       | Monopartite |
| <b>SI-TPL3</b> | 5.8      | 283      | ILKRPLTPPATLGMLDYQSADHEQLMKRL    | Bipartite   |
| <b>SI-TPL4</b> | 5.3/ 5   | 74       | FEIRKQKYLEALDRHDQAKAVEILVKDLKV   | Bipartite   |
|                |          | 163      | FPSLKNSRLRTLINQSLNWQHQLCKNPKP    |             |
| <b>SI-TPL5</b> | 5.2/5.7  | -37      | FEIRKQKYLEALDRNDRPKAVEILVKDLKV   | Bipartite   |
|                |          | -249     | MLKRPRTPPTNNSAVDYQTADSEHMLKRSRP  |             |
| <b>SI-TPL6</b> | 4.1/ 4.2 | -139     | RNRIMKILRVVIETNPQLNGKLHFPELTKSRL | Bipartite   |
|                |          | -271     | MPKPSKAISAATPAQLVKQMPGPSKAISA    |             |
